# Supplementary material for: Chemical doping of a semicrystalline polymeric semiconductor realizing high stability and work function
Source: Royal Society of Chemistry journal article supplement (doi:10.1039/d4tc01406e), 2024-01-01
Supplement: d4tc01406e1.pdf [file d4tc01406e1.pdf]

Supplementary Materials for  
Chemical doping of a semicrystalline polymeric semiconductor  
realizing high stability and work function

Zhenyun Xiao, Masaki Ishii,  
Jun Takeya, Katsuhiko Ariga, and Yu Yamashita\*

Email: YAMASHITA.Yu@nims.go.jp

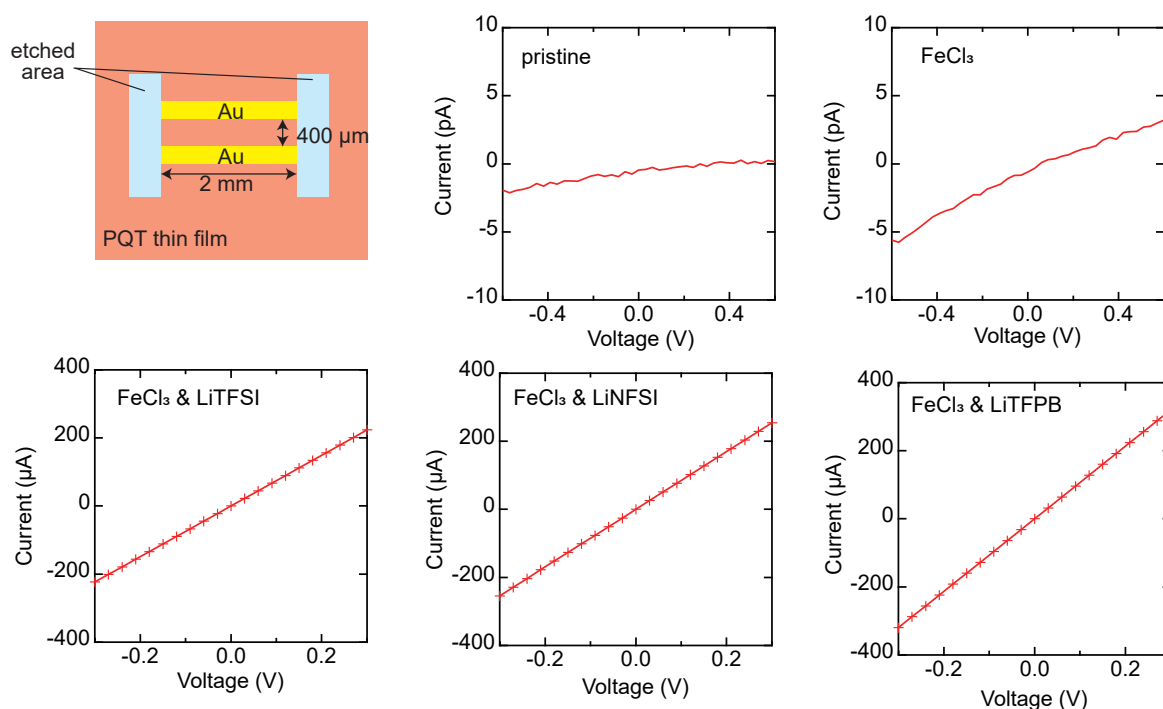

**Supplementary Figure S 1:** An illustration of channel geometry and representative current-voltage curves of the doped PQT thin films after the doping process. Etching of the semiconductor films were simply done by scratching them with a stick. Current-voltage curves were measured in air using a Keithley 2612B source meter. Employed dopants are denoted in the panels.

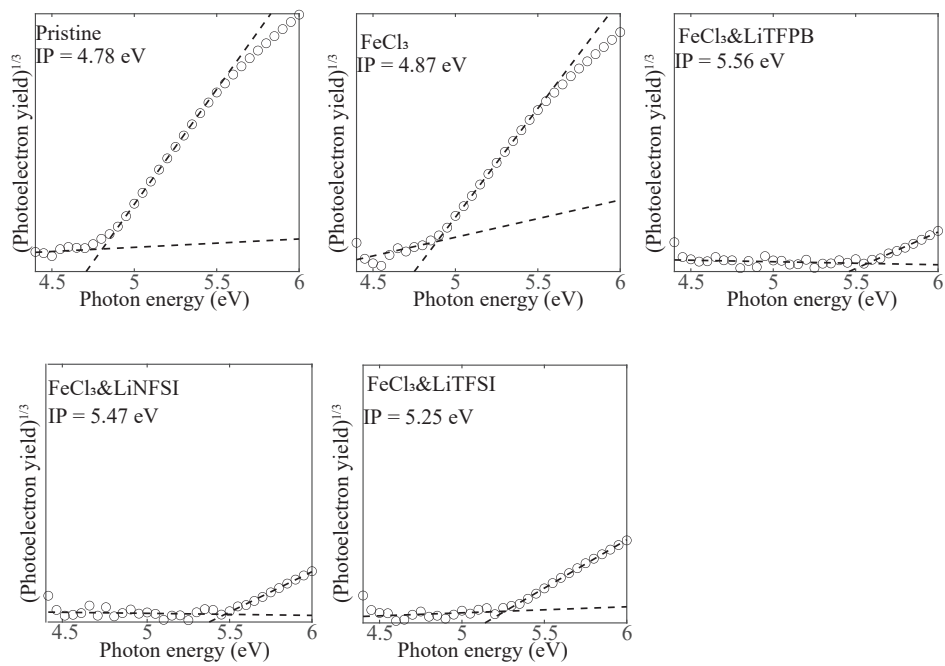

**Supplementary Figure S 2:** Fitting of PYS spectra of PQT thin films. Employed dopants and value of ionization potential are denoted in the panels.

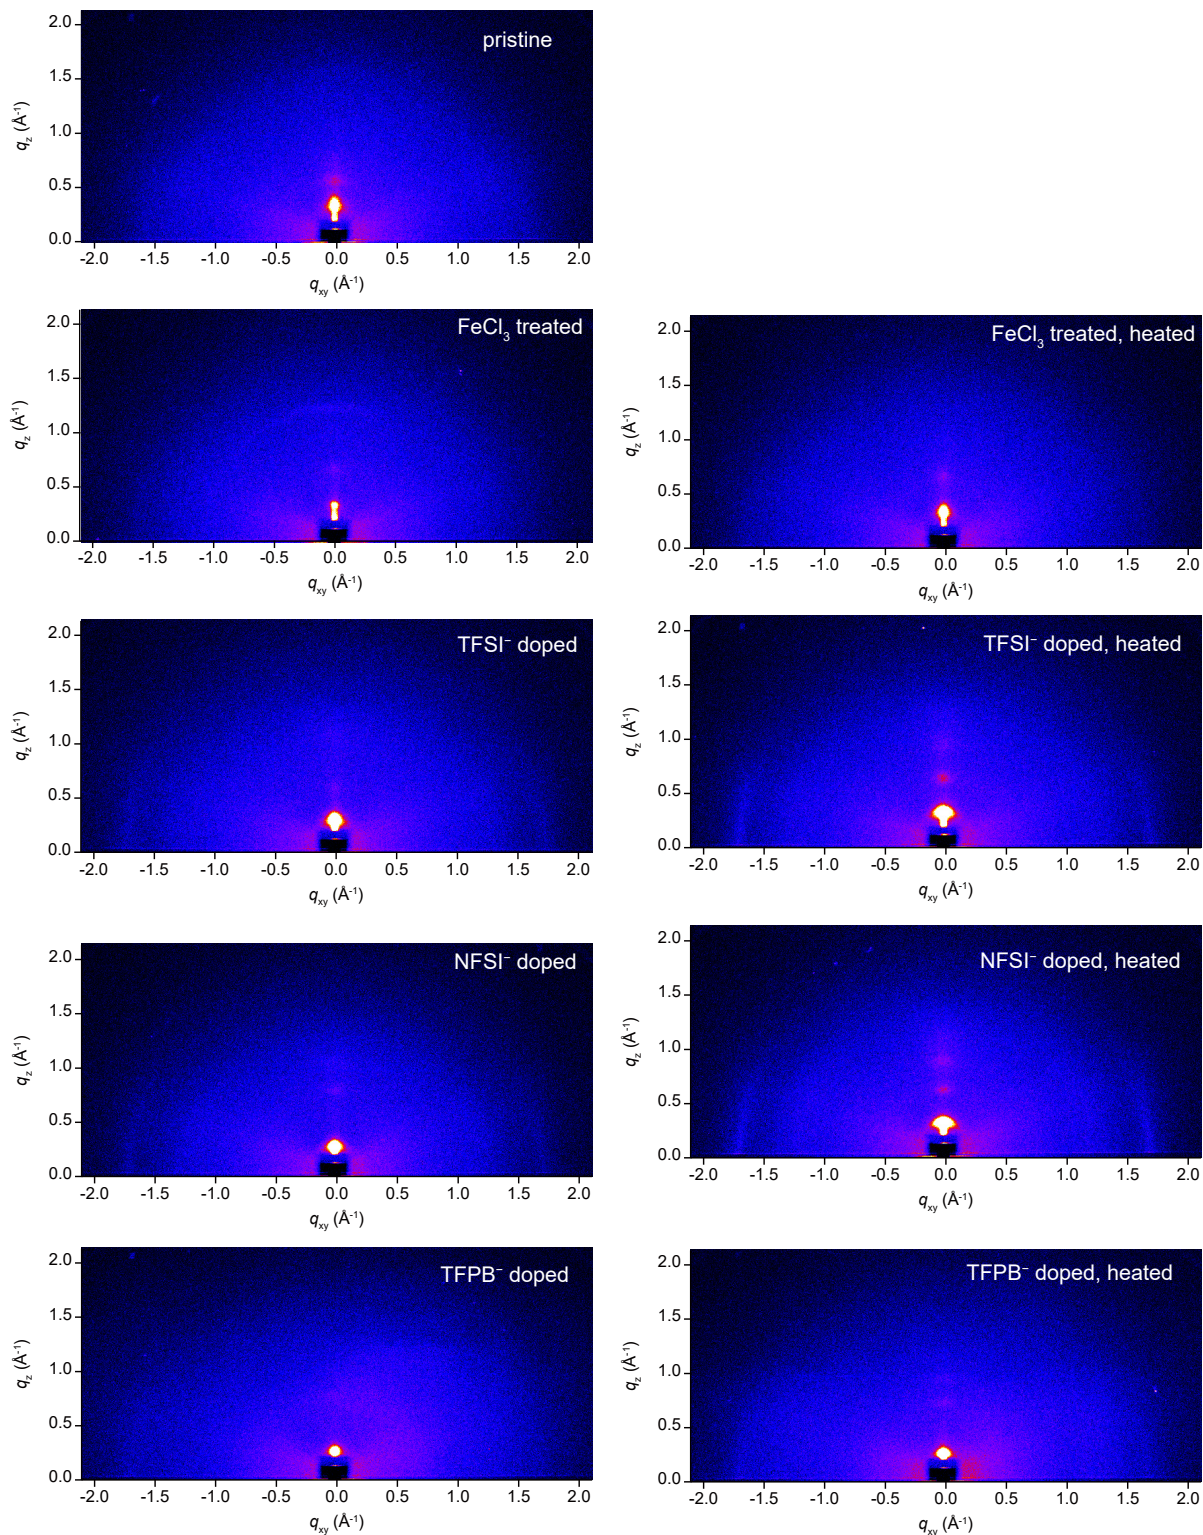

**Supplementary Figure S 3:** GIWAXS images of treated and untreated PQT thin films. Employed treatments are denoted in the figures. Samples heated at  $125^\circ\text{C}$  for 1 h after the chemical doping process are denoted as heated.

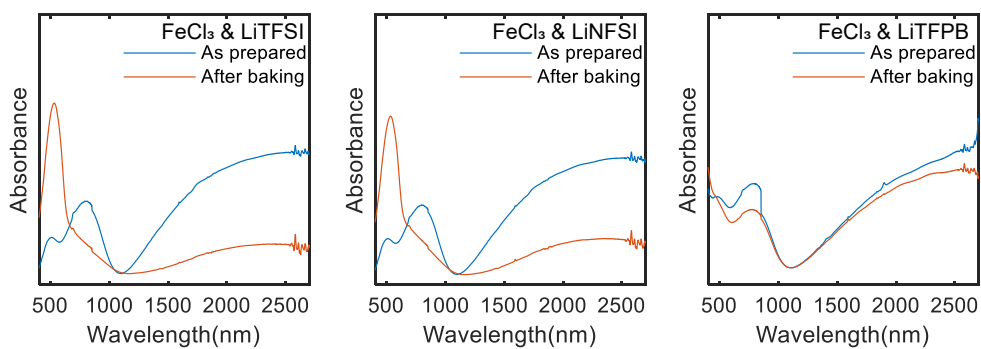

**Supplementary Figure S 4:** UV-Vis spectra of doped PQT thin films before and after heating in a nitrogen atmosphere at 125°C for 1 h. Employed dopants are denoted in the panels.

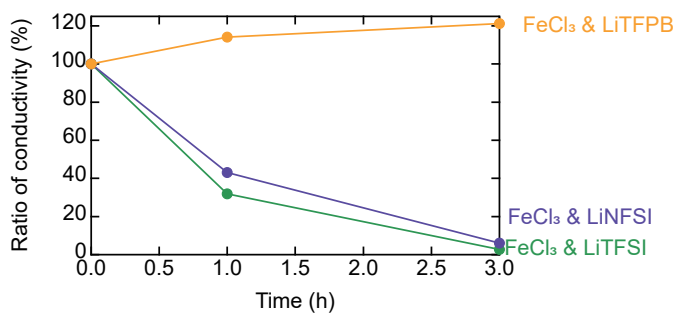

**Supplementary Figure S 5:** Ratio of remaining conductivity of doped PQT thin films after heating at 100°C in a nitrogen atmosphere. Employed dopants are denoted.

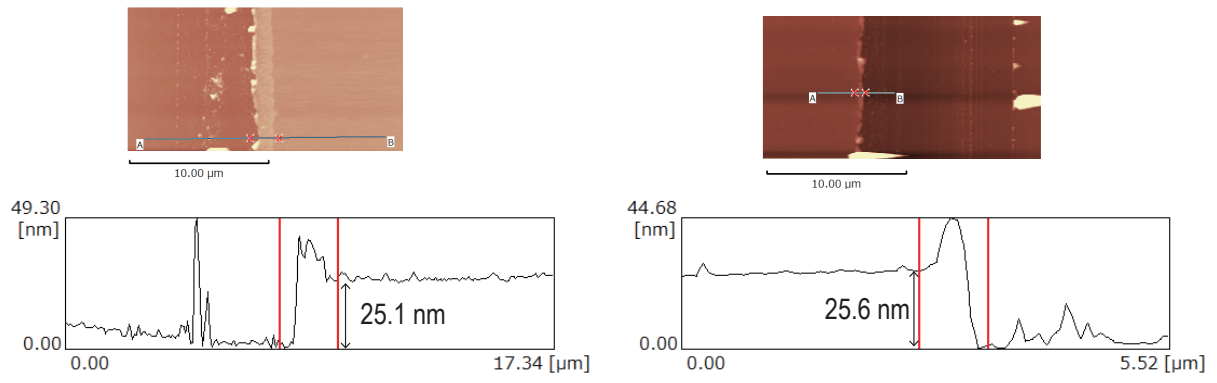

**Supplementary Figure S 6:** The AFM images of PQT thin film to determine the thickness. The thin film was scratched to measure the thickness.
